# Supplementary material for: Stress-induced immunosuppression affecting immune response to Newcastle disease virus vaccine through “miR-155-CTLA-4” pathway in chickens
Source: PeerJ. 2023 Feb 27;11:e14529. doi: 10.7717/peerj.14529 (PMC9979835; doi:10.7717/peerj.14529)
Supplement: Supplemental Information 2 [file peerj-11-14529-s002.xlsx]

## Sheet: Sheet1
weight coefficient
	ND组				Dex+ND组
1dpi	92.7	96.2	91.9	1dpi	74.68	66.75	69.56
2dpi	115	121.8	114.3	2dpi	79.71	79.19	80.5
3dpi	112	65.6	118.8	3dpi	80.12	85.2	79.5
4dpi	129.7	107.1	136.5	4dpi	97.26	96.18	106.7
5dpi	136.37	136.49	133.72	5dpi	101.43	105.72	106.11
7dpi	154.83	160.78	159.06	7dpi	122.53	116.4	122.4
14dpi	227.3	235.2	239.8	14dpi	182.6	189.9	189.2
21dpi	306.7	329.8	278.5	21dpi	270.7	271	253.2
28dpi	393.1	364.9	392.2	28dpi	385.7	335.7	354.5
35dpi	440	425	425	35dpi	465	395	400
Thymus coefficient
	ND组				Dex+ND组
1dpi	0.0017691	0.0016216	0.0020056	1dpi	0.0005222	0.0005401	0.000633
2dpi	0.0022906	0.0021085	0.002654	2dpi	0.0011667	0.000675	0.000754
3dpi	0.002299	0.0025089	0.0021465	3dpi	0.0010681	0.0015723	0.001047
4dpi	0.002448	0.0022129	0.002485	4dpi	0.0014703	0.001362	0.0014808
5dpi	0.0024764	0.0026099	0.002693	5dpi	0.0020157	0.0012864	0.001225
7dpi	0.0026446	0.0023262	0.0026521	7dpi	0.0018118	0.0016753	0.001378
14dpi	0.0022534	0.0025438	0.0022354	14dpi	0.0017798	0.0016854	0.0016258
21dpi	0.00219433	0.00276531	0.00258169	21dpi	0.0020002	0.0020168	0.0020016
28dpi	0.002376	0.0023558	0.0023988	28dpi	0.0020404	0.0020931	0.0020984
35dpi	0.0027906	0.0026359	0.002479	35dpi	0.002395	0.0024695	0.002361
Spleen coefficient
	ND组				Dex+ND组
1dpi	0.0013736	0.001272	0.0014671	1dpi	0.000616	0.000733	0.0009713
2dpi	0.001039	0.0014175	0.0012609	2dpi	0.0012502	0.0011429	0.001197
3dpi	0.0014888	0.0013056	0.0012143	3dpi	0.0008362	0.0011972	0.0012453
4dpi	0.0013655	0.0013344	0.0015806	4dpi	0.0015628	0.000863	0.001134
5dpi	0.0012686	0.0012821	0.0014358	5dpi	0.0011831	0.0011256	0.0007539
7dpi	0.0012982	0.0012253	0.0017352	7dpi	0.0011997	0.0014003	0.0013154
14dpi	0.0012978	0.0017687	0.0017903	14dpi	0.0014294	0.0017588	0.0012791
21dpi	0.0018683	0.0013281	0.0020898	21dpi	0.0014149	0.0017712	0.001722
28dpi	0.0017731	0.0011746	0.0011153	28dpi	0.0015945	0.001838	0.0016164
35dpi	0.0013409	0.0020824	0.0019482	35dpi	0.0013234	0.0015475	0.001858
Coefficient of bursa of Fabricius
ND组					Dex+ND组
1dpi	0.003445	0.003869	0.0035	1dpi	0.001066	0.001155	0.001153
2dpi	0.004707	0.004672	0.004881	2dpi	0.001471	0.001284	0.001252
3dpi	0.004087	0.005182	0.005371	3dpi	0.001855	0.001784	0.001023
4dpi	0.004492	0.005262	0.005483	4dpi	0.002014	0.002027	0.00175
5dpi	0.005432	0.005765	0.005873	5dpi	0.002312	0.002506	0.00261
7dpi	0.0059876	0.0051432	0.005639	7dpi	0.003172	0.003214	0.003444
14dpi	0.006145	0.006432	0.006707	14dpi	0.004177	0.003588	0.004148
21dpi	0.006864	0.006899	0.006863	21dpi	0.00485	0.006244	0.005545
28dpi	0.007795	0.006817	0.008598	28dpi	0.006718	0.006105	0.0064363
35dpi	0.006922	0.006253	0.006817	35dpi	0.005515	0.006701	0.005545
